# Supplementary material for: Exposure–Response Relationships for Efficacy and Safety of Risankizumab in Phase II and III Trials in Psoriasis Patients
Source: PubMed Central journal article supplement — Clin Pharmacol Ther. 2019 Sep 26;107(2):378–87. doi: 10.1002/cpt.1594 (PMC7006881; doi:10.1002/cpt.1594), 2019-09-26
Supplement: CPT-107-378-s002.pdf [file CPT-107-378-s002.pdf]

**Figure S2. Graphical comparison of observed and model-predicted probability of PASI and sPGA endpoints at weeks 16 and 52 based on analyses of the Phase 2 and 3 trials**

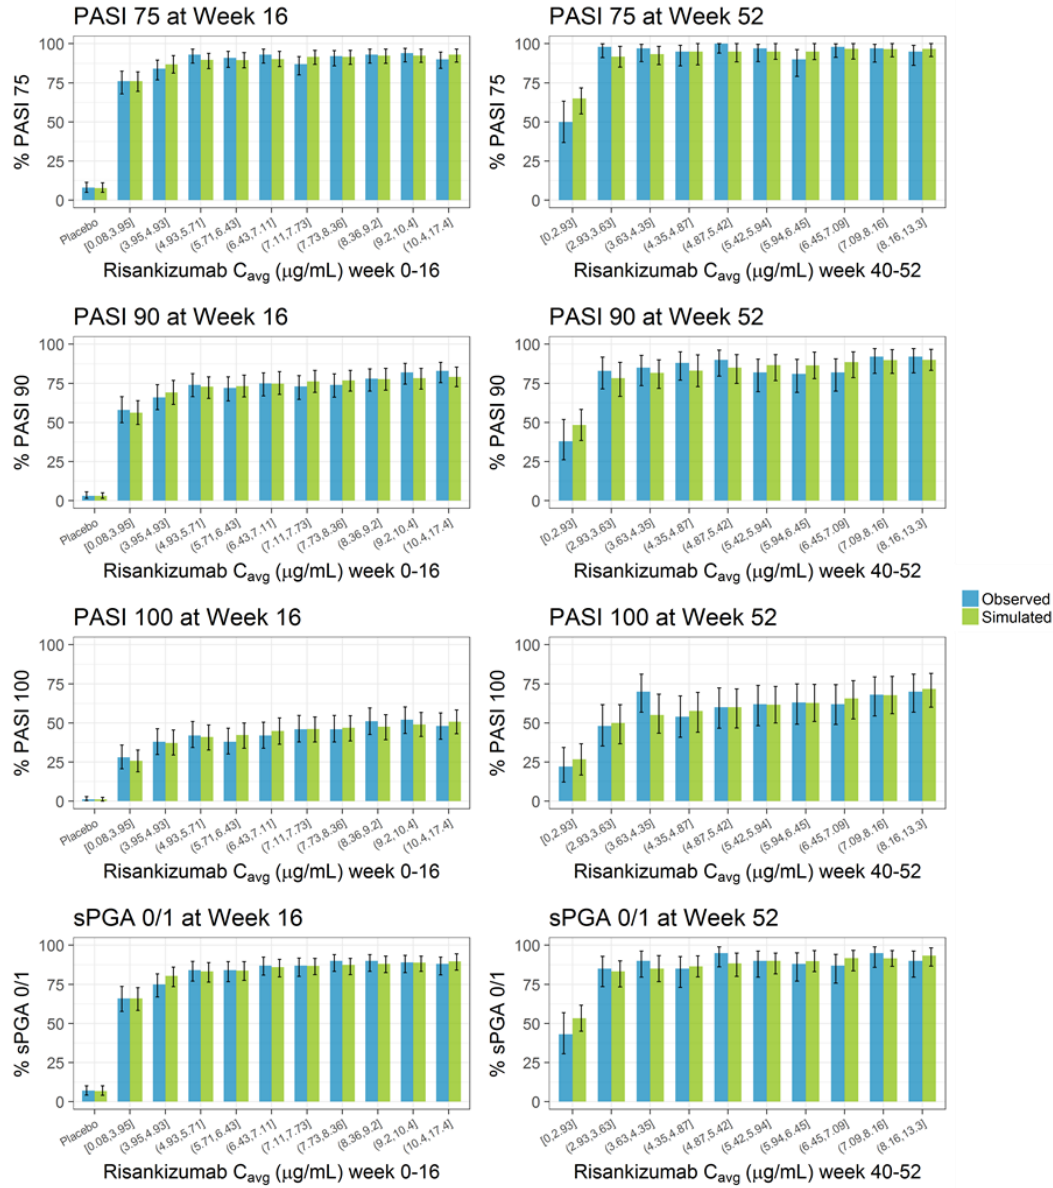

Blue bars and their errors: Observed PASI75, PASI90, PASI100 or sPGA0/1 response and corresponding 95% exact binomial confidence intervals.

Green bars and their errors: Simulated proportion of responders (median) and their 95% prediction interval (2.5th and 97.5th percentiles) calculated based on 1000 simulation replicates.
