# Supplementary material for: Exposure–Response Relationships for Efficacy and Safety of Risankizumab in Phase II and III Trials in Psoriasis Patients
Source: PubMed Central journal article supplement — Clin Pharmacol Ther. 2019 Sep 26;107(2):378–87. doi: 10.1002/cpt.1594 (PMC7006881; doi:10.1002/cpt.1594), 2019-09-26
Supplement: CPT-107-378-s003.pdf [file CPT-107-378-s003.pdf]

**Figure S3. Exposure-Response Relationships Between Risankizumab Plasma  $C_{avg}$  and Safety Events of Interest Over the First 16 Weeks**

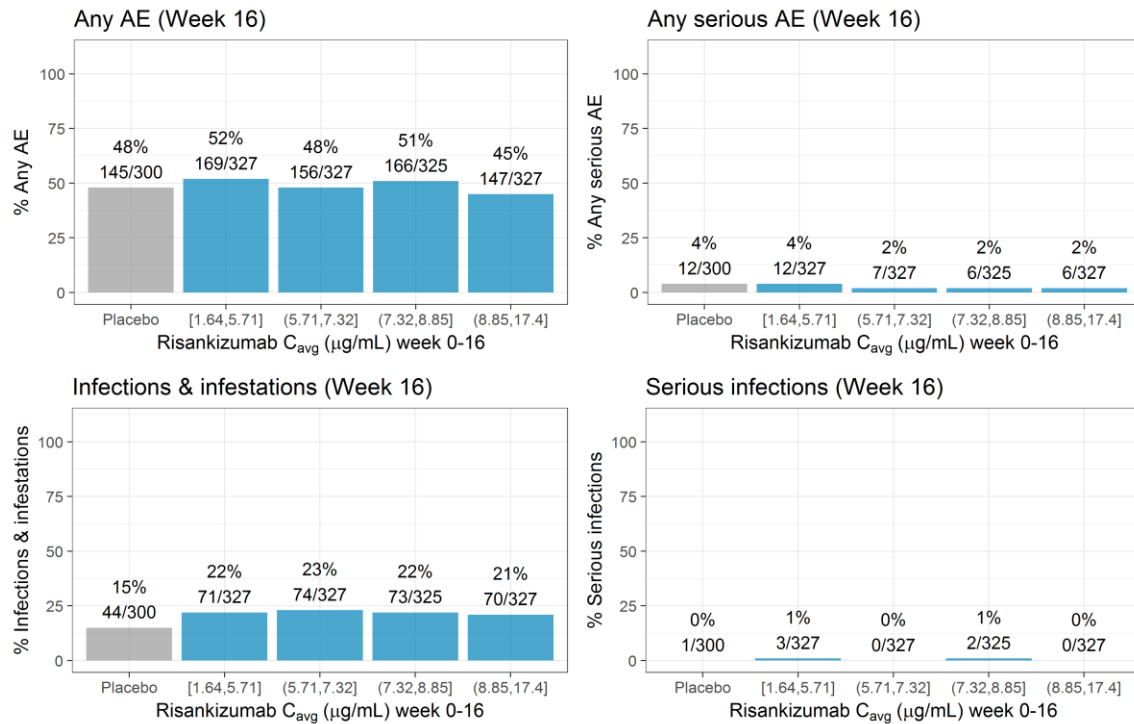

Note:  $C_{avg}$  represents average concentration from week 0 to 16

Median of  $C_{avg}$  ( $\mu\text{g/mL}$ ): Quartile 1 = 4.76  $\mu\text{g/mL}$ , Quartile 2 = 6.57  $\mu\text{g/mL}$ , Quartile 3 = 8.02  $\mu\text{g/mL}$ , Quartile 4 = 10.13  $\mu\text{g/mL}$ .

As shown in Figure S3, the incidence of any infection and infestation over the first 16-week treatment period (week 0-16) was slightly higher for risankizumab than placebo; however, no exposure-related trend was noted among subjects who received risankizumab treatment.
